# Supplementary material for: Morphological, biochemical, transcriptional and epigenetic responses to fasting and refeeding in intestine of Xenopus laevis
Source: PubMed Central journal article supplement (PMC4721045; doi:10.1186/s13578-016-0067-9), 2016-01-21
Supplement: 13578_2016_67_MOESM1_ESM.pdf [file 13578_2016_67_MOESM1_ESM.pdf]

Figure S1

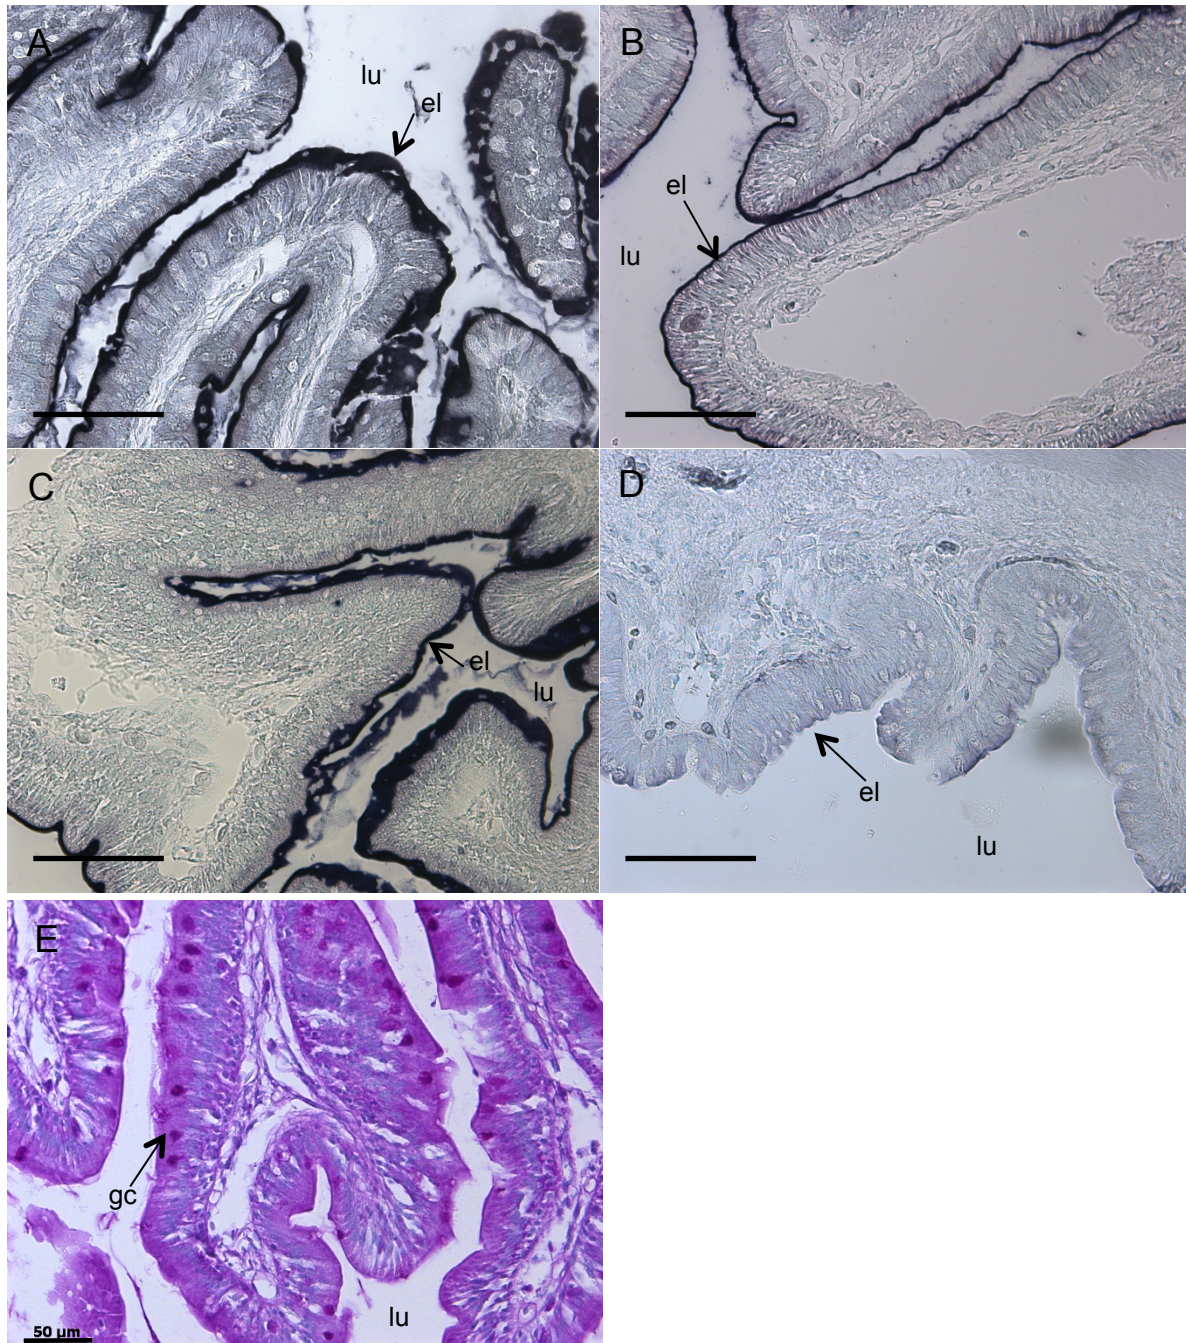

**Fig. S1.** Histochemical localization of alkaline phosphatase activity and PAS-positive goblet cells in the intestine of fed, fast or refed *X. laevis*. The intestines were collected from frogs that were fed for 22 days (*A and E*), fasted for 22 days (*B*), fasted for 21 days and then refed for 1 day (*C*) and fasted for 5 months (*D*). *A-D*; alkaline phosphatase activity; *E*; PAS-staining. el; epithelial layer; lu, lumen; gc; goblet cells. Bar, 500  $\mu\text{m}$  (*A-D*) and 50  $\mu\text{m}$  (*E*).

Alkaline phosphatase histochemistry was carried out according to the Cox and Singer method (1999). Fixed tissue sections were soaked in 0.2% Tween-20/PBS for 10 min and then rinsed in PBS for 10 min. Sections were incubated with the labeling reaction solution contained 0.17 mg/ml 5-bromo-4-chloro-3-indolyl-phosphate and 0.33 mg/ml nitro blue tetrazolium in reaction buffer (100 mM Tris-HCl, 100 mM NaCl, 5 mM  $\text{MgCl}_2$ , pH 9.5) for 30 min in the dark. De-waxed sections were stained with periodic acid-Schiff-hematoxylin (PAS-H) to localize the goblet cells (McManus, 1948).

Cox WG, Singer VL. A High-resolution, fluorescence-based method for localization of endogenous alkaline phosphatase activity. *J Histochem Cytochem.* 1999;47(11):1443–55.

McManus JF. Histological and histochemical uses of periodic acid. *Stain Technol.* 1948;23(3):99-108.
