# Supplementary material for: Morphological, biochemical, transcriptional and epigenetic responses to fasting and refeeding in intestine of Xenopus laevis
Source: PubMed Central journal article supplement (PMC4721045; doi:10.1186/s13578-016-0067-9), 2016-01-21
Supplement: 13578_2016_67_MOESM4_ESM.pdf [file 13578_2016_67_MOESM4_ESM.pdf]

Figure S3

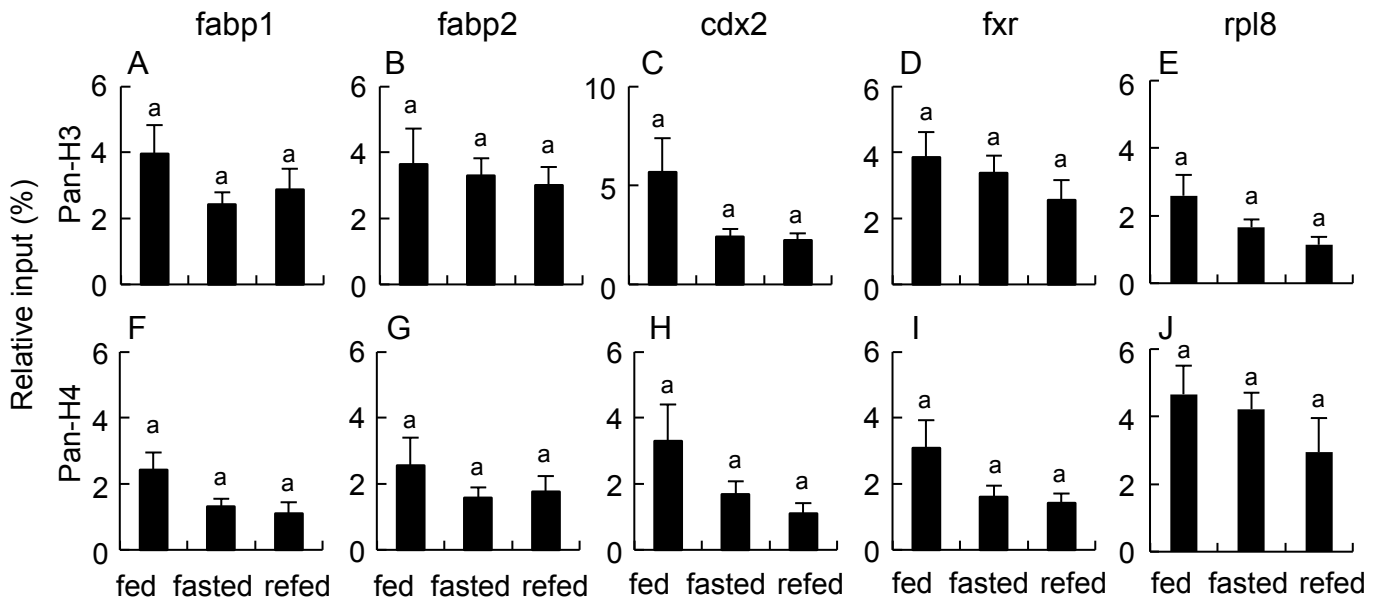

Fig. S3. Amounts of pan-histones H3 and H4 on *fabp1*, *fabp2*, *cdx2*, *fxr* and *rpl8* genes in the intestines of fed, fasted and refed *X. laevis*. Chromatin samples were prepared from the intestines from animals that were fed for 22 days (*fed*), fasted for 22 days (*fasted*), and fasted for 21 days and then refed for 1 day (*refed*). Signals of CHIP on *fabp1* (A and F), *fabp2* (B and G), *cdx2* (C and H), *fxr* (D and I) and *rpl8* (E and J) genes were detected by qPCR following immunoprecipitation with antibodies against pan-H3 (A-E) and pan-H4 (F-J). Primers used in qPCR are shown in Table S2. Each value is the mean  $\pm$  SEM ( $n = 8$ ). Distinct letters denote significantly different means, and were determined by one-way analysis of variance and Fisher's least significant difference test for multiple comparisons ( $p < 0.05$ ).
