# Supplementary material for: Morphological, biochemical, transcriptional and epigenetic responses to fasting and refeeding in intestine of Xenopus laevis
Source: Cell Biosci. 2016 Jan 21;6:2. doi: 10.1186/s13578-016-0067-9 (PMC4721045; doi:10.1186/s13578-016-0067-9)
Supplement: Supplementary file 5 — 10.1186/s13578-016-0067-9 Specificity of antibodies used in this study. [file 13578_2016_67_MOESM5_ESM.xlsx]

## Sheet: Sheet1
	Table S2. Specificity of antibodies used in this study.
	Target	Supplier	Catalog Number	Specificity or references (Pubmed ID)
	pan-H3	Millipore	07-690	human, mouse, chicken, yeast
	pan-H4	Millipore	05-857	human, chicken, fly, C. elegans, yeast
	H3K9Ac	Millipore	07-352	broad
	H4Ac	Millipore	06-598	Xenopus oocyte: PMID 12727881
	H3K9me1	Millipore	07-450	broad
	H3K9me2	Millipore	07-441	broad
	H3K9me3	Millipore	07-442	X. tropicalis: PMID 22147009
	H3K4me1	Abcam	ab8895	X. laevis
	H3K4me2	Abcam	ab32356	X. laevis
	H3K4me3	Abcam	ab1012	X. laevis
	H3K36me1	Abcam	ab9048	X. laevis
	H3K36me2	Abcam	ab9049	zebrafish: PMID 21383318
	H3K36me3	Abcam	ab9050	X. laevis
	RNAPII	Covance	MMS-126R	extensive
	RNAPIIS2P	Abcam	ab5095	X. laevis
	RNAPIIS5P	Abcam	ab5131	wide-range
	PCNA	Dako	M0879	Rana esculenta; PMID 17244732
	a-tubulin	Santa Cruz	sc5268	PMID 25791374
